# Supplementary material for: Molecular, genetic and evolutionary analysis of a paracentric inversion in Arabidopsis thaliana
Source: PubMed Central journal article supplement — Plant J. 2016 Sep 13;88(2):159–78. doi: 10.1111/tpj.13262 (PMC5113708; doi:10.1111/tpj.13262), 2016-09-13
Supplement: TPJ-88-159-s016.pdf [file TPJ-88-159-s016.pdf]

**S3 Table. List of primers for the fragments a to e**

| <b>probe</b> | <b>primer</b> | <b>position on chrom. 4</b> | <b>sequence (5' - 3')</b> | <b>fragment size (bp)</b> |
|--------------|---------------|-----------------------------|---------------------------|---------------------------|
| <b>a</b>     | <b>a1-f</b>   | 1533374                     | gccctcatagggagagacatct    | 4567                      |
|              | <b>a1-r</b>   | 1537963                     | ctctgtgctgttgaacctagtg    |                           |
|              | <b>a2-f</b>   | 1537484                     | ggtcaaaacgttcttcatgtcgc   | 4987                      |
|              | <b>a2-r</b>   | 1542483                     | tcccactttcgcactctttgctg   |                           |
|              | <b>a3-f</b>   | 1541824                     | ttggcgacgtagcagatgcattt   | 5100                      |
|              | <b>a3-r</b>   | 1546946                     | atgaggcataaaccttgagaacg   |                           |
| <b>b</b>     | <b>b1-f</b>   | 1506924                     | caaatgggattcacctaatactt   | 4387                      |
|              | <b>b1-r</b>   | 1511342                     | gagatgtgtaccggctcgggca    |                           |
|              | <b>b2-f</b>   | 1510771                     | atcaacgagtccttggcaatcgg   | 4380                      |
|              | <b>b2-r</b>   | 1515174                     | ctctacgttgactctatcttctc   |                           |
|              | <b>b3-f</b>   | 1514544                     | gtgaagccgctccagcacagc     | 4720                      |
|              | <b>b3-r</b>   | 1519286                     | cagctaacagcacatcccactca   |                           |
| <b>c</b>     | <b>c1-f</b>   | 1552694                     | gtgtgtgaagagtggggagtcca   | 4971                      |
|              | <b>c1-r</b>   | 1557686                     | gctcaagtcgacccaagcagc     |                           |
|              | <b>c2-f</b>   | 1557265                     | cggctctaagtctccgctatgag   | 5166                      |
|              | <b>c2-r</b>   | 1562453                     | gccacatattcaccgggggtggtt  |                           |
|              | <b>c3-f</b>   | 1562186                     | gatggatttcaggattaaggatgg  | 4736                      |
|              | <b>c3-r</b>   | 1566943                     | gtgagttgtgaccagcggccga    |                           |
| <b>d</b>     | <b>d1-f</b>   | 1591500                     | gagaagaagagtgggtccttgg    | 5340                      |
|              | <b>d1-r</b>   | 1596840                     | aattccacttcagattcacagtc   |                           |
|              | <b>d2-f</b>   | 1595077                     | atgaggcgtatgtgaggctatga   | 3944                      |
|              | <b>d2-r</b>   | 1599021                     | ccattcggagcctttatcatgtc   |                           |
|              | <b>d3--f</b>  | 1598390                     | gttgggcttctaaagatgtgag    | 5232                      |
|              | <b>d3-r</b>   | 1603622                     | cgcccacaacttctcatttgag    |                           |
| <b>e1</b>    | <b>e1-f</b>   | 1605118                     | cagatgcttactccagccgtcag   | 3922                      |
|              | <b>e1-r</b>   | 1609040                     | gcaacggcatgacacatcatacg   |                           |
| <b>e2</b>    | <b>e2-f</b>   | 1608700                     | cgatatgtgaatcccgaagagcc   | 3982                      |
|              | <b>e2-r</b>   | 1612682                     | tcatctacatgtcttctccaac    |                           |
| <b>e3</b>    | <b>e3-f</b>   | 1612008                     | gcgaaggtggttagtcgaaatc    | 4594                      |
|              | <b>e3-r</b>   | 1616602                     | tcagagcgtatcaacaacctatga  |                           |
| <b>e4</b>    | <b>e4-f</b>   | 1616187                     | ccagccttatagtgtgggcaagc   | 4852                      |
|              | <b>e4-r</b>   | 1621039                     | gcctctacaccgccactaataa    |                           |
