# Supplementary material for: Molecular, genetic and evolutionary analysis of a paracentric inversion in Arabidopsis thaliana
Source: PubMed Central journal article supplement — Plant J. 2016 Sep 13;88(2):159–78. doi: 10.1111/tpj.13262 (PMC5113708; doi:10.1111/tpj.13262), 2016-09-13
Supplement: TPJ-88-159-s019.pdf [file TPJ-88-159-s019.pdf]

**S6 Table. List of 52 representative European and North American inversion accessions ranked according to their left and right introgression site.**

| group                 | name accession                  | left R in kb | right R in kb | country  |
|-----------------------|---------------------------------|--------------|---------------|----------|
| <b>Col group</b>      | Roed-17-319                     | 0            | 13570         | Swe      |
|                       | Col-0                           | 0            | 18580         | C-Europe |
|                       | PL0-1                           | 0            | 18580         | Fra      |
|                       | Bla-1.7015.mon-mpi <sup>§</sup> | 0            | 18580         | Esp      |
|                       | QUI-8 <sup>§</sup>              | 0            | 18580         | Fra      |
|                       | Malii-1 <sup>§</sup>            | 0            | 18580         | SRB      |
|                       | Boo2 <sup>§</sup>               | 0            | 18580         | Swe      |
| <b>1344 group</b>     | Ws-2                            | 1344         | 2822          | Rus      |
|                       | Ragl-1                          | 1344         | 2822          | UK       |
|                       | Ob-0                            | 1344         | 4843          | Ger      |
|                       | Kro-0                           | 1344         | 5233          | Ger      |
|                       | Ak-1                            | 1344         | 5247          | Ger      |
|                       | En-2                            | 1344         | 5247          | Ger      |
|                       | Mh-0                            | 1344         | 5299          | Pol      |
|                       | Star-8                          | 1344         | 5370          | Ger      |
|                       | Or-0                            | 1344         | 6807          | Ger      |
|                       | Nz-1                            | 1344         | 6807          | Tanzania |
| <b>american group</b> | DIR-9                           | 1354         | 5166          | Fra      |
|                       | NOZ-6                           | 1354         | 5166          | Fra      |
|                       | Gifu-2                          | 1354         | 5166          | Jap      |
|                       | UKSW06-333                      | 1354         | 5166          | UK       |
|                       | Pna-17                          | 1354         | 5166          | USA      |
|                       | Yo-0                            | 1354         | 5166          | USA      |
|                       | Gre-0                           | 1354         | 5166          | USA      |
|                       | Pna-10                          | 1354         | 5166          | USA      |
|                       | Rrs-10                          | 1354         | 5166          | USA      |
|                       | Tol-0                           | 1354         | 5166          | USA      |
|                       | Tul-0                           | 1354         | 5166          | USA      |
|                       | Buckhorn_Pass.SALK              | 1354         | 5166          | USA      |
|                       | Dem4-SALK                       | 1354         | 5166          | USA      |
|                       | Knox10                          | 1354         | 5166          | USA      |
|                       | Mv-0                            | 1354         | 5166          | USA      |
|                       | MNF-Che-2                       | 1354         | 5166          | USA      |
|                       | MNF-Pot-21                      | 1354         | 5166          | USA      |
|                       | MNF-Pot-75                      | 1354         | 5166          | USA      |
|                       | Mdn-1                           | 1354         | 5166          | USA      |
|                       | Paw-26                          | 1354         | 5166          | USA      |
|                       | SLSP-31                         | 1354         | 5166          | USA      |
|                       | NC-6                            | 1354         | 5166          | USA      |
| <b>Swe-Ger group</b>  | T540                            | 1588         | 4887          | Swe      |
|                       | Do-0                            | 1588         | 5240          | Ger      |
|                       | Ale-Stenar-64-24                | 1588         | 5240          | Swe      |
|                       | Ste-4                           | 1588         | 5240          | Swe      |
| <b>others</b>         | Ca-0                            | 1199         | 5634          | Ger      |
|                       | Gu-0                            | 1238         | 5596          | Ger      |
|                       | Nie1-2                          | 1391         | 5292          | Ger      |
|                       | Taal-07                         | 1391         | 14821         | Swe      |
|                       | Si-0                            | 1464         | 4825          | Ger      |
|                       | Nw-0                            | 1464         | 5427          | Ger      |
|                       | Ha-0                            | 1530         | 5373          | Ger      |
|                       | Ba-1                            | 1540         | 5428          | UK       |
|                       | Lom1-1                          | 1572         | 5448          | Swe      |

R = recombination site of introgression

<sup>§</sup> = These accessions are potential contaminants (Anastasio et al., 2011)
