# Supplementary figures and images for: Molecular, genetic and evolutionary analysis of a paracentric inversion in Arabidopsis thaliana
Source: PubMed Central journal article supplement — Plant J. 2016 Sep 13;88(2):159–78. doi: 10.1111/tpj.13262 (PMC5113708; doi:10.1111/tpj.13262), 2016-09-13

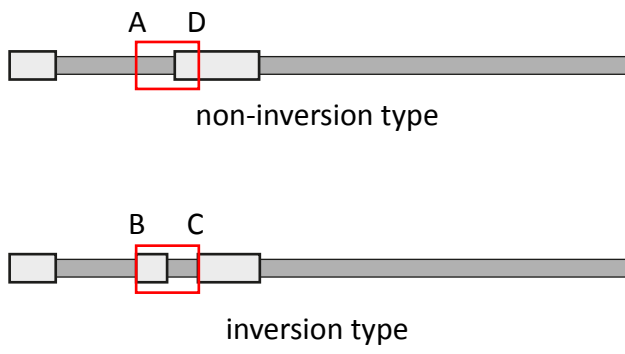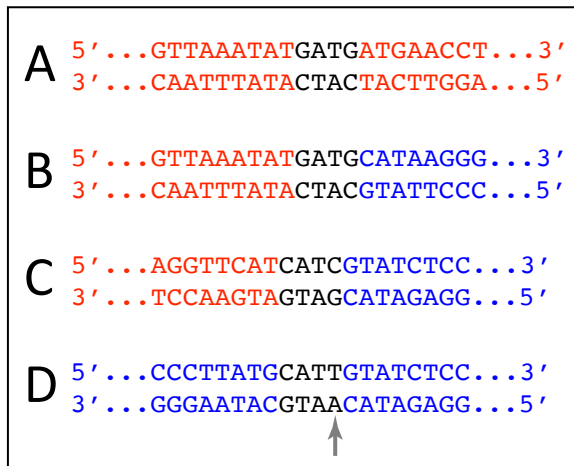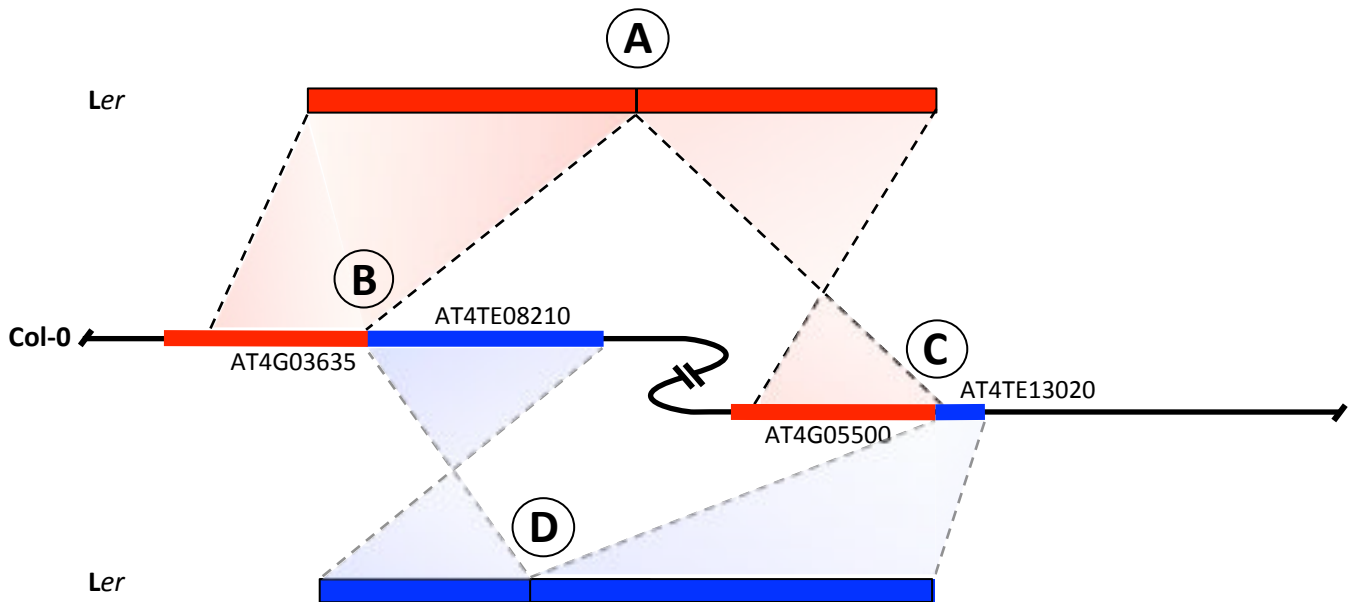

Figure supplement 3

Supplement: TPJ-88-159-s003.pdf [file TPJ-88-159-s003.pdf]

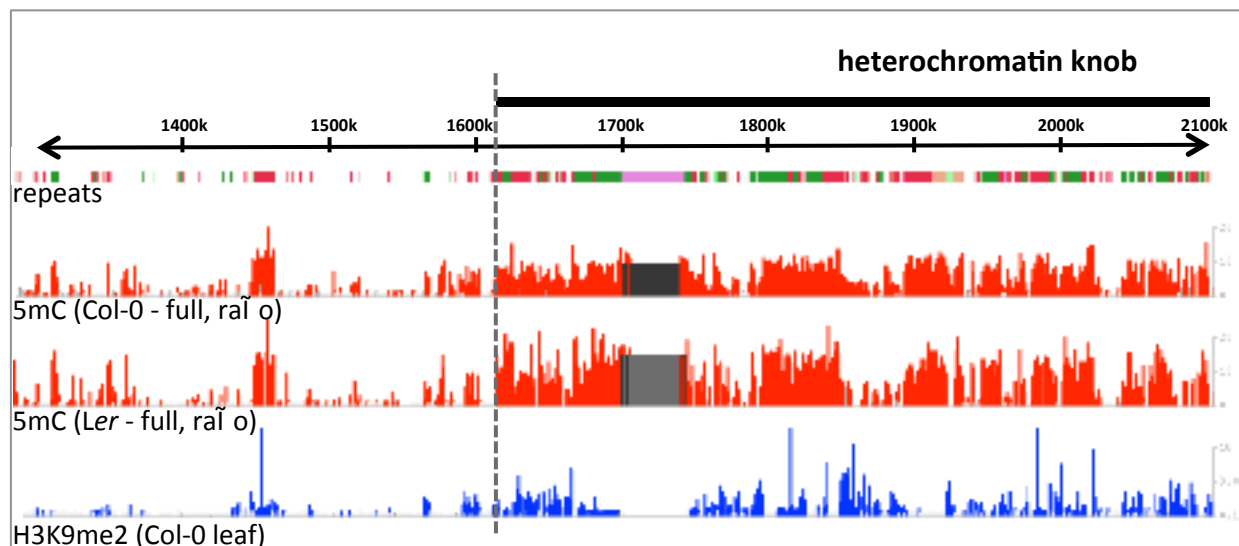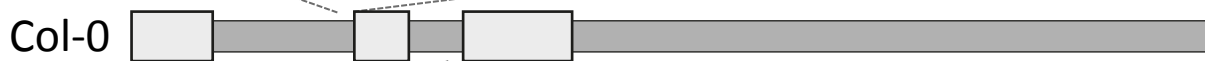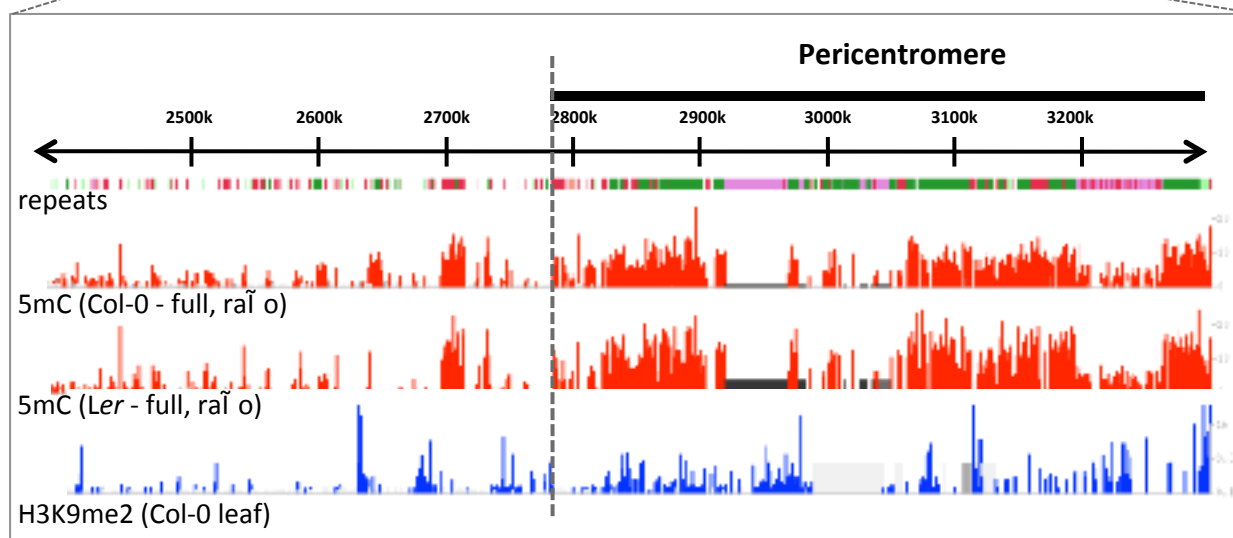

Figure supplement 6

Supplement: TPJ-88-159-s006.pdf [file TPJ-88-159-s006.pdf]

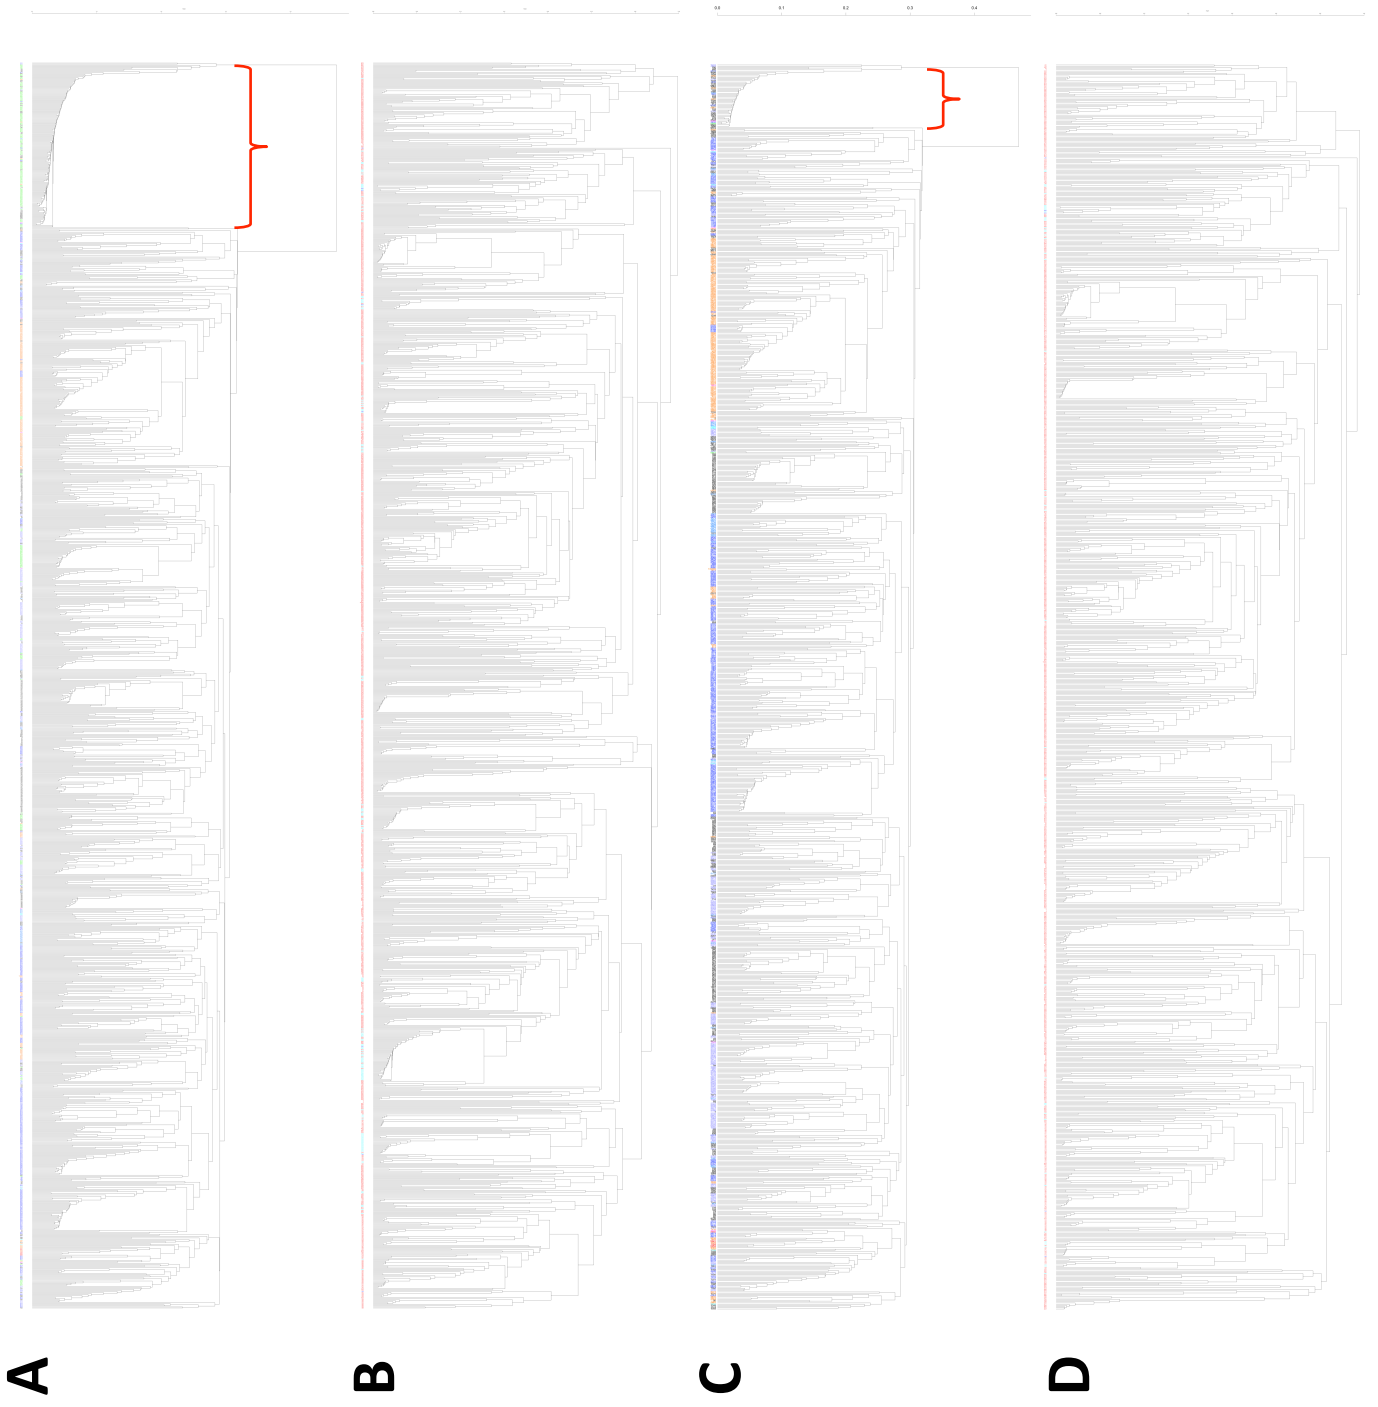

Figure supplement 7

Supplement: TPJ-88-159-s007.pdf [file TPJ-88-159-s007.pdf]

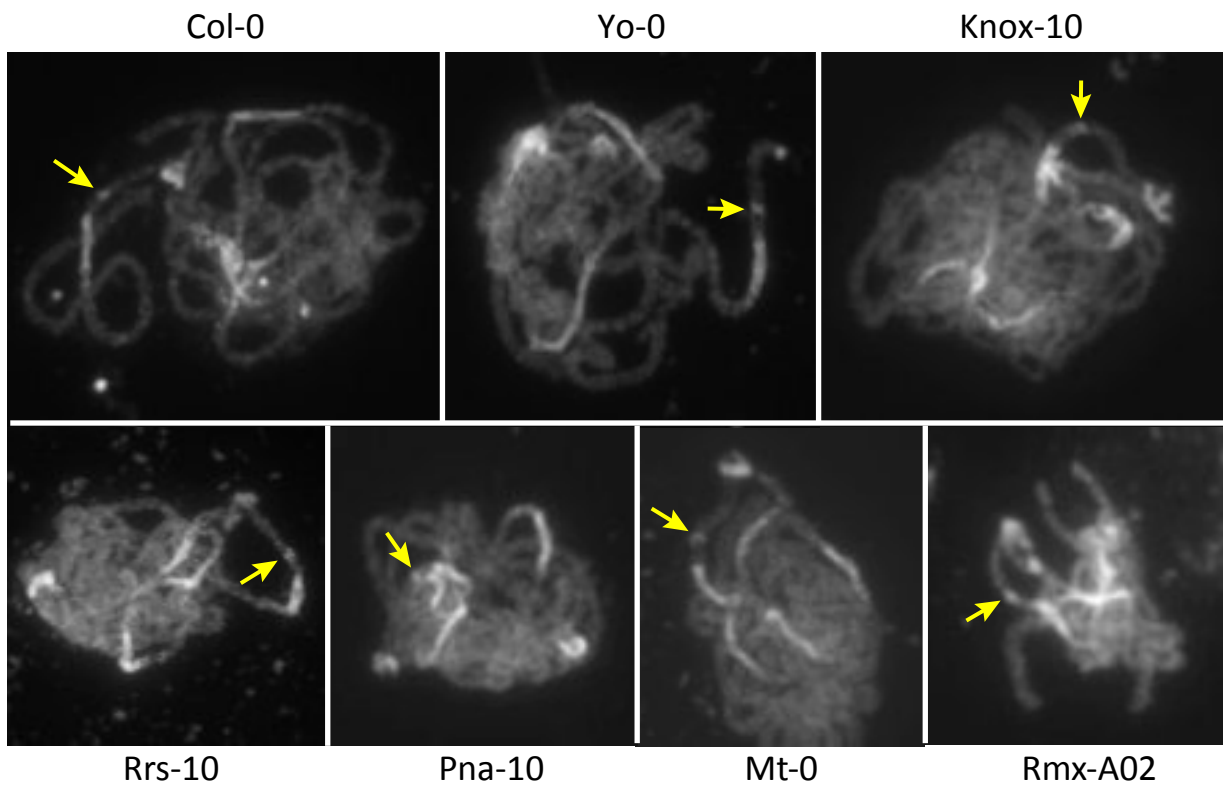

Figure supplement 9

Supplement: TPJ-88-159-s009.pdf [file TPJ-88-159-s009.pdf]

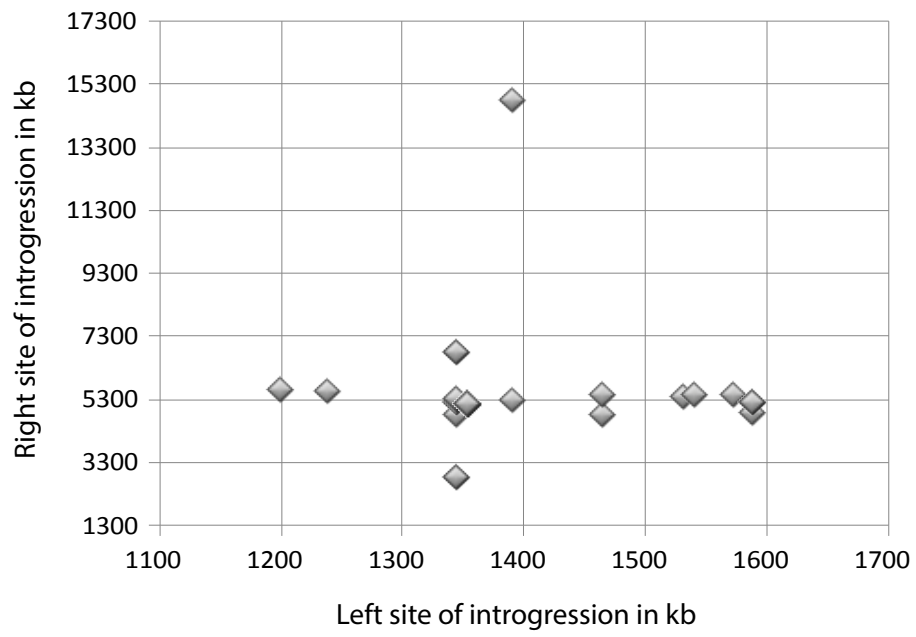

Figure supplement 10

Supplement: TPJ-88-159-s010.pdf [file TPJ-88-159-s010.pdf]

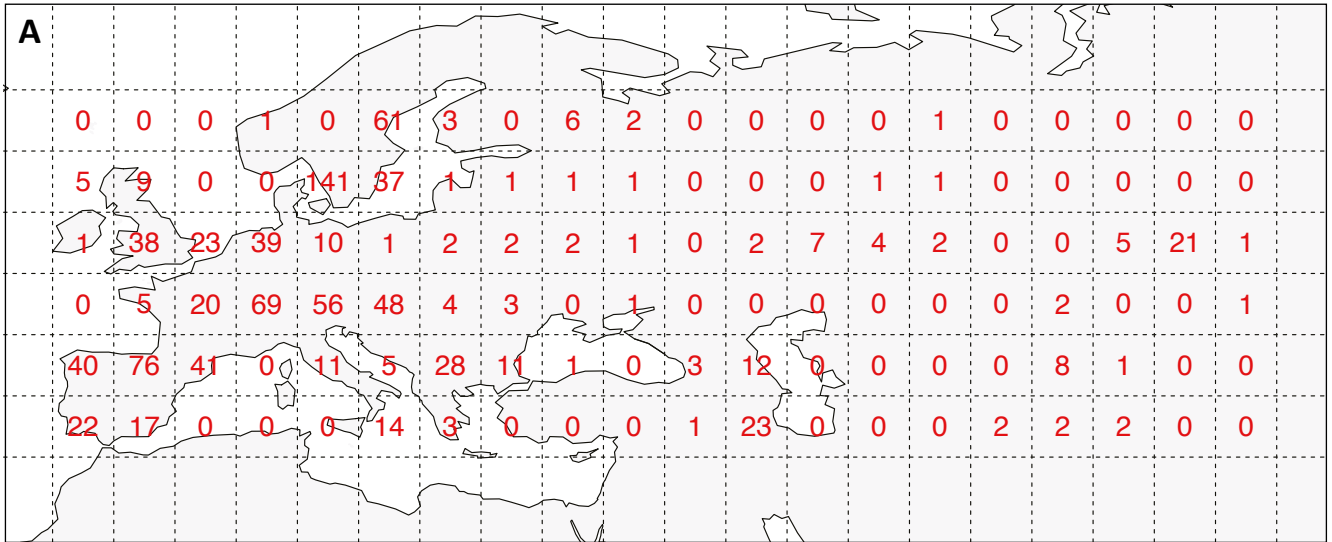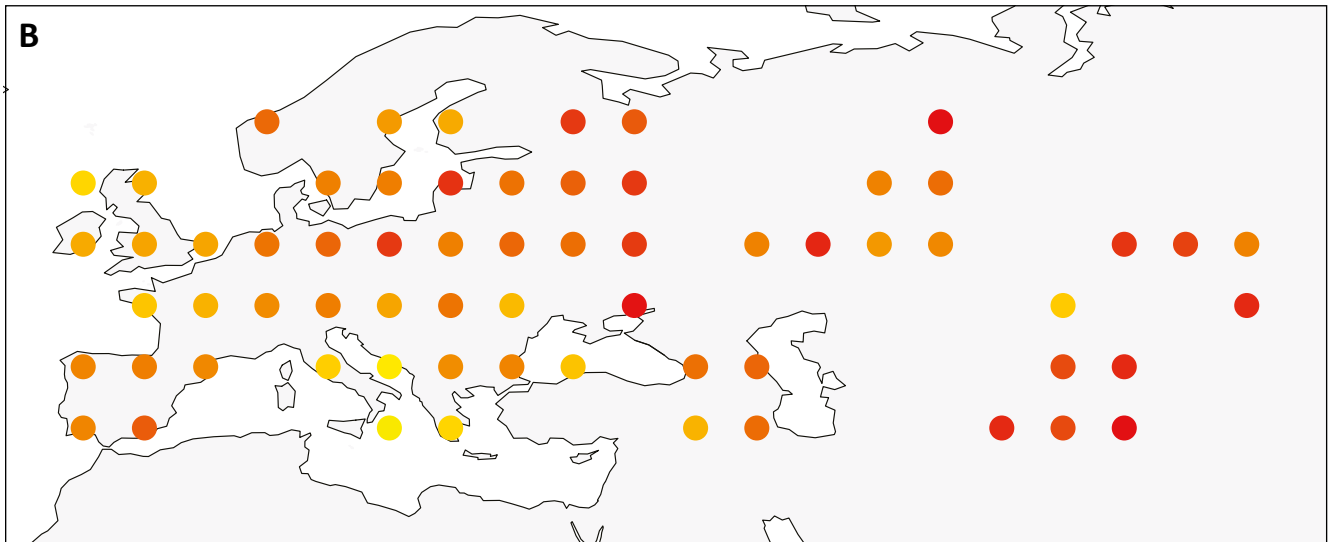

Figure supplement 11

Supplement: TPJ-88-159-s011.pdf [file TPJ-88-159-s011.pdf]

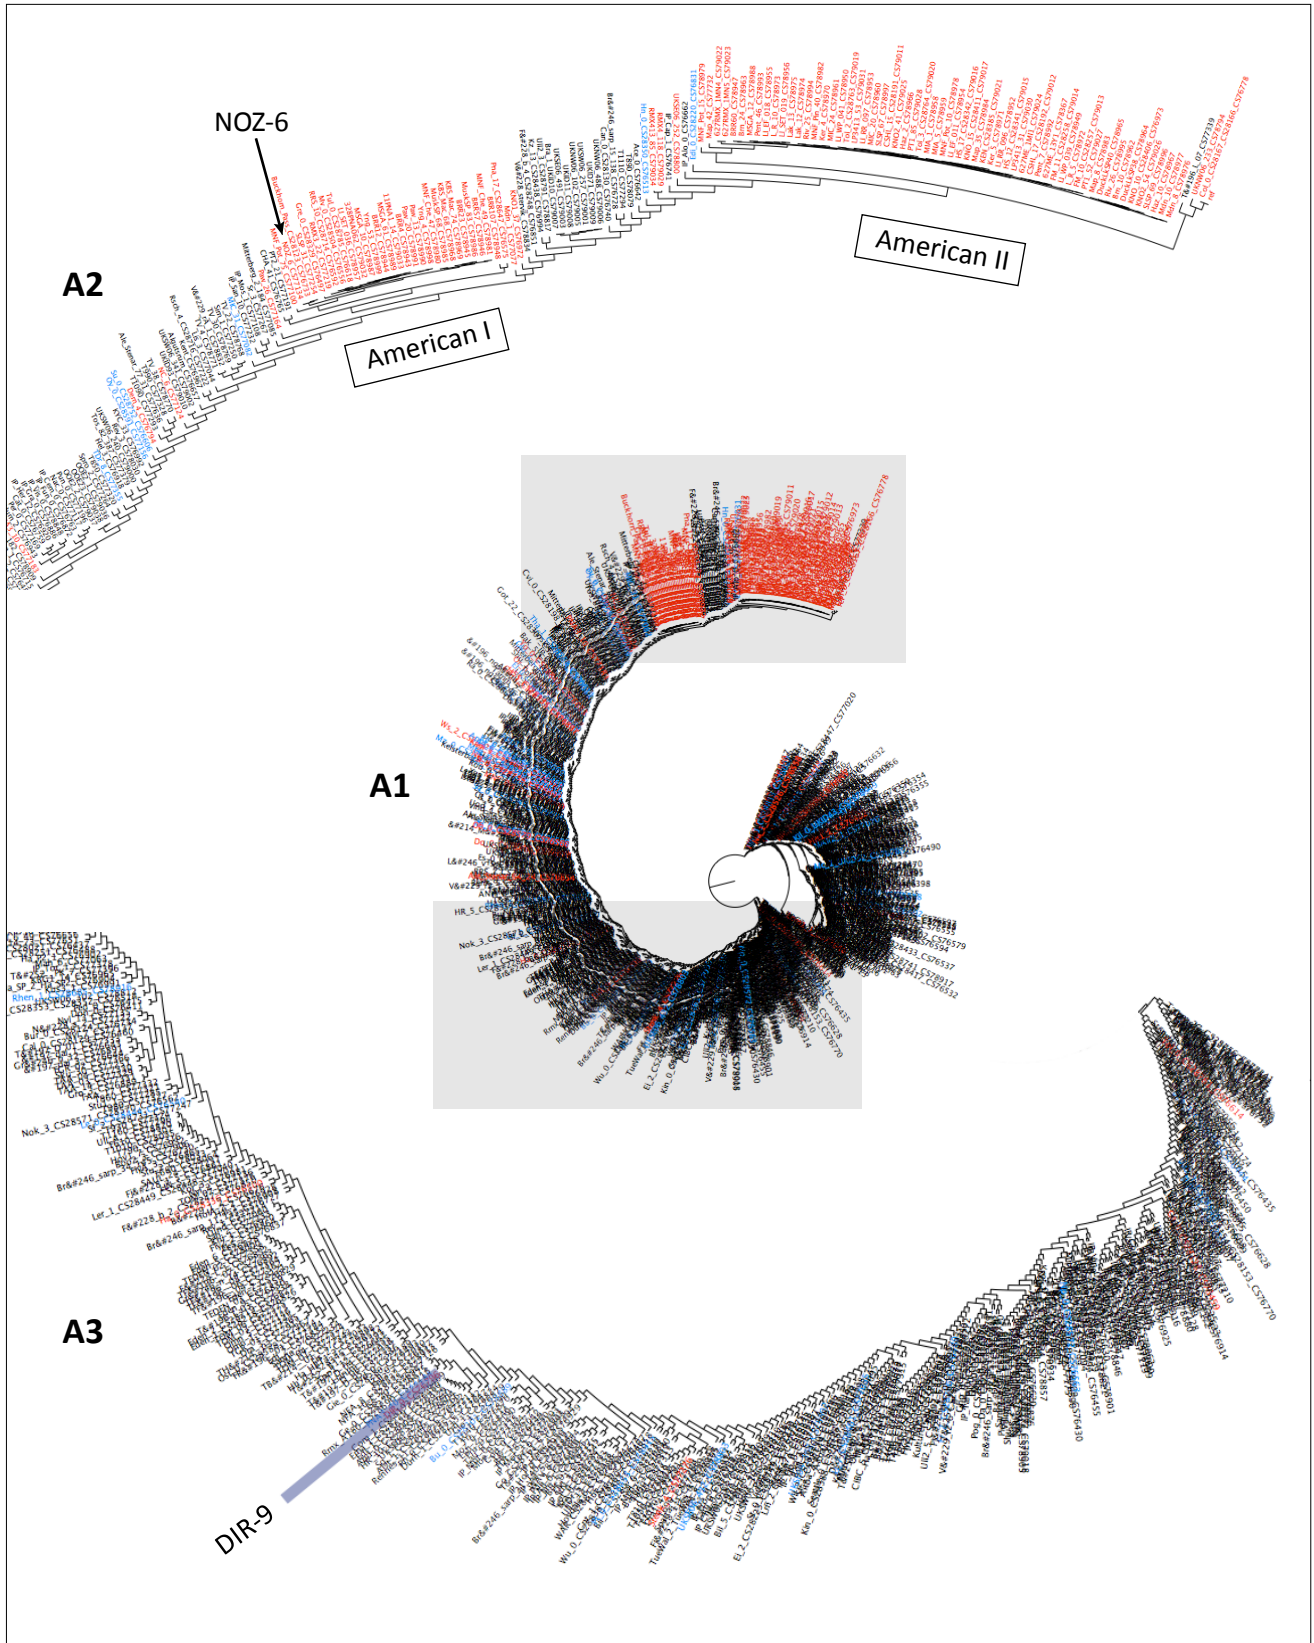

Figure supplement 12

Supplement: TPJ-88-159-s012.pdf [file TPJ-88-159-s012.pdf]
